# Supplementary material for: Dual Targeting of Antioxidant and Metabolic Enzymes to the Mitochondrion and the Apicoplast of Toxoplasma gondii
Source: PubMed Central journal article supplement (PMC1959373; doi:10.1371/journal.ppat.0030115), 2007-08-31
Supplement: ppat.0030115.sg001.pdf [file ppat.0030115.sg001.pdf]

Supplementary Figure S1

# Aconitase / IRP

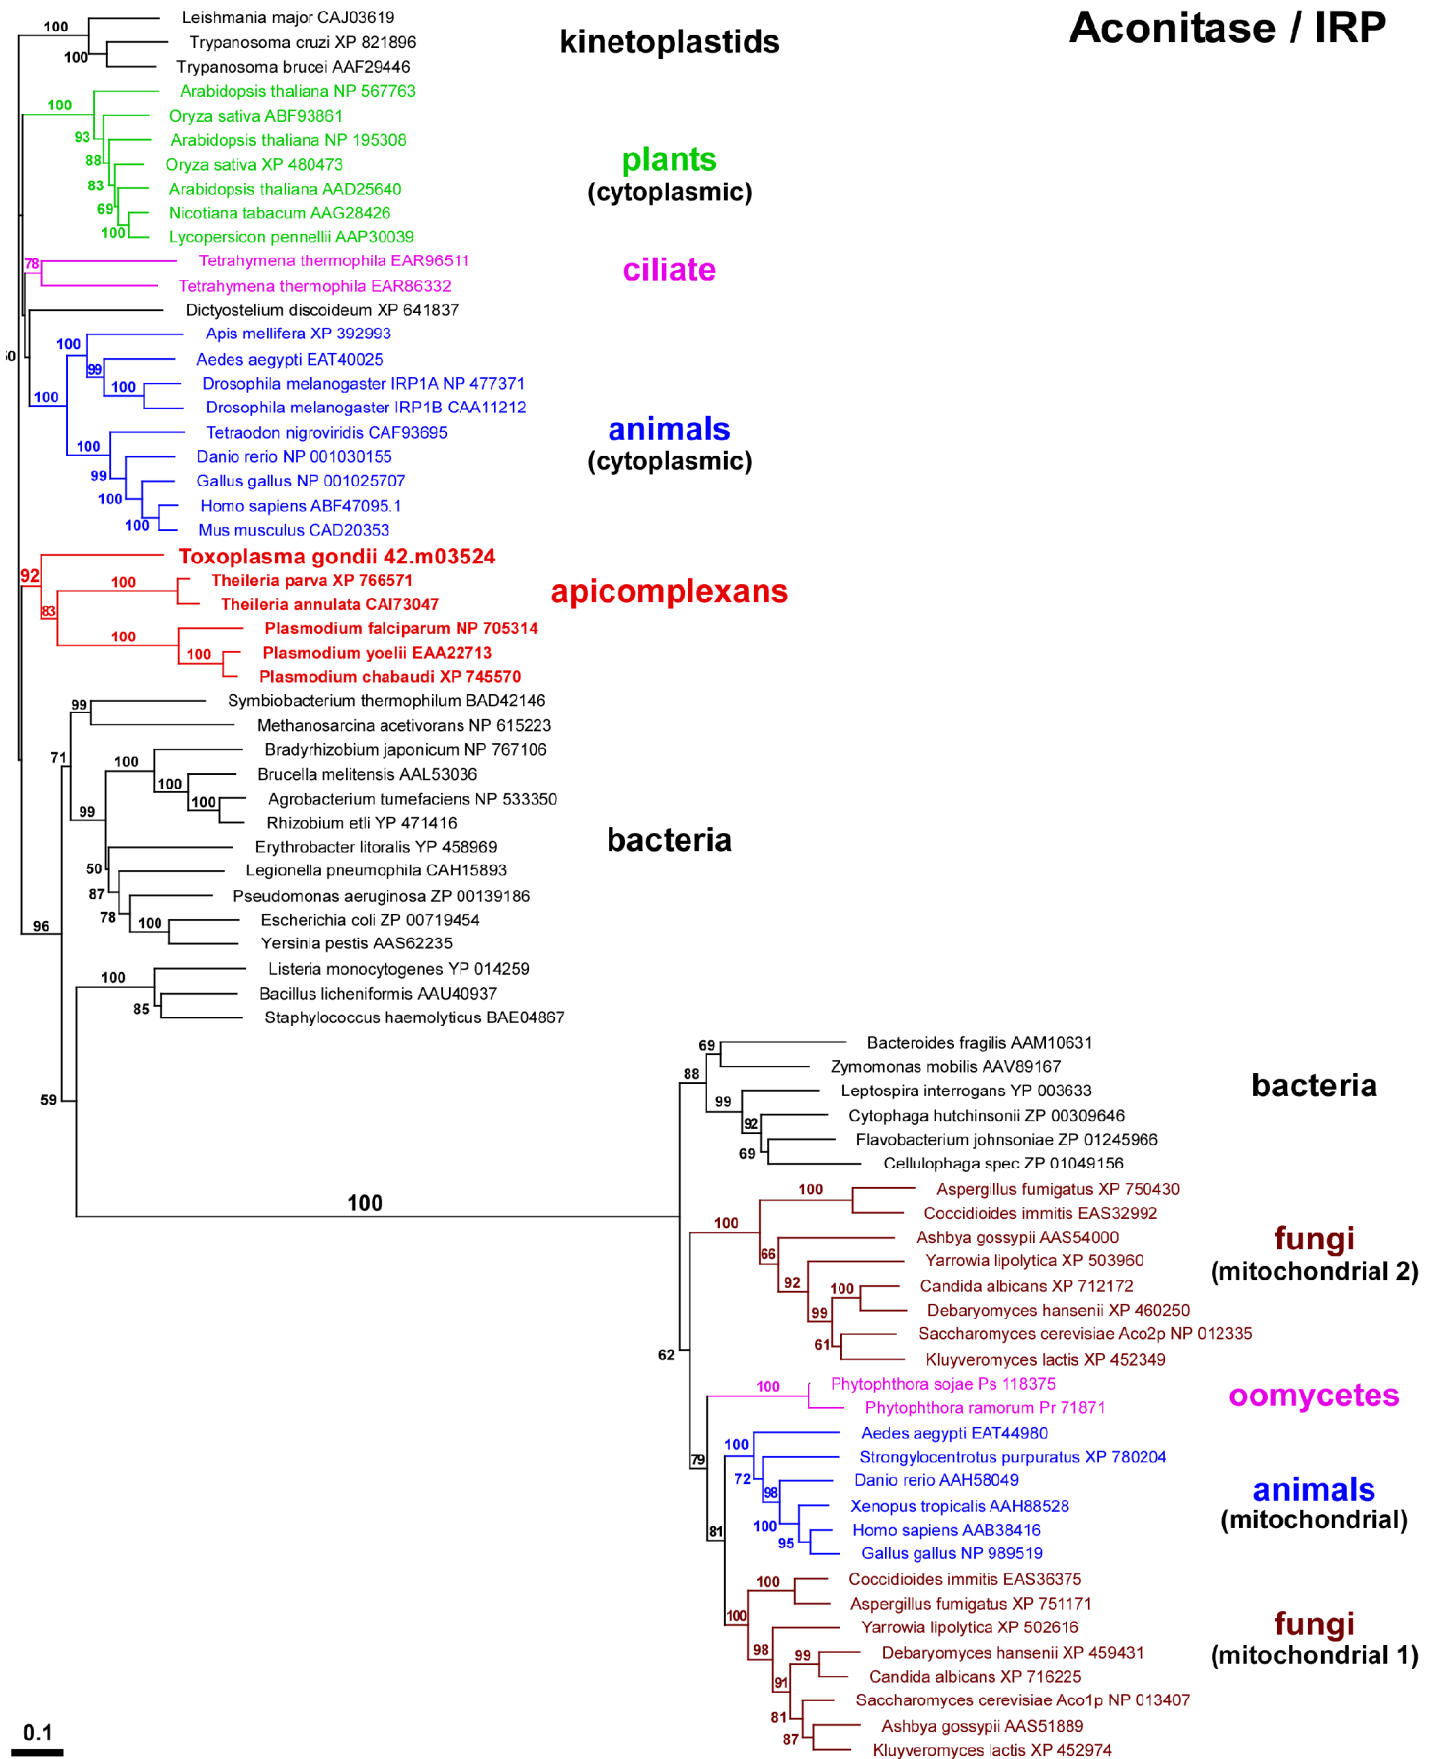

0.1
